# Supplementary material for: Optimization of b‐value schemes for estimation of the diffusion coefficient and the perfusion fraction with segmented intravoxel incoherent motion model fitting
Source: PubMed Central journal article supplement — Magn Reson Med. 2019 May 31;82(4):1541–52. doi: 10.1002/mrm.27826 (PMC6772171; doi:10.1002/mrm.27826), 2019-05-31
Supplement: MRM-82-1541-s001.pdf [file MRM-82-1541-s001.pdf]

## Supporting Information

### Supporting Information Derivations of Equations

#### Error propagation

If  $D$  and  $f$  are estimated based on a b-value scheme with three b-values ( $b_0 = 0$  and  $b_1, b_2 > 0$ ), the variability of the parameter estimates can be calculated through error propagation (Eqs. 6 and 7). The derivations are outlined below.

$$\sigma_D^2 = \sum_{i=0}^2 \sigma_{S(b_i)}^2 \left( \frac{\partial D}{\partial S(b_i)} \right)^2 = \sum_{i=0}^2 \frac{\sigma^2}{n_i} \left( \frac{\partial}{\partial S(b_i)} \frac{\ln S(b_1) - \ln S(b_2)}{b_2 - b_1} \right)^2 = \sigma^2 \sum_{i=1}^2 \frac{1}{n_i} \left( \frac{1}{b_2 - b_1} \frac{1}{S_0(1-f)e^{-b_i D}} \right)^2 \quad (S1)$$

$$\begin{aligned} \sigma_f^2 &= \sum_{i=0}^2 \sigma_{S(b_i)}^2 \left( \frac{\partial f}{\partial S(b_i)} \right)^2 = \sigma^2 \sum_{i=0}^2 \frac{1}{n_i} \left( \frac{\partial}{\partial S(b_i)} \left[ 1 - \frac{1}{S(b_0)} \left( \frac{S(b_1)^{b_2}}{S(b_2)^{b_1}} \right)^{\frac{1}{b_2 - b_1}} \right] \right)^2 = \\ &= \sigma^2 \left\{ \frac{1}{n_0} \left( \frac{1-f}{S_0} \right)^2 + \frac{1}{S_0^2 (b_2 - b_1)^2} \left[ \frac{1}{n_1} (b_2 e^{b_1 D})^2 + \frac{1}{n_2} (b_1 e^{b_2 D})^2 \right] \right\} \quad (S2) \end{aligned}$$

The noise level for a given b-value is assumed to depend only on the number of acquisition of the particular b-value, i.e.  $\sigma_{S(b_i)}^2 = \sigma^2/n_i$ . The derivations were performed by inserting the closed form solution of the particular parameter, evaluating the partial derivative and then use the signal model (Eq. 2).

#### Elements of the Fisher matrix

The elements of the Fisher matrix are composed of combinations of partial derivatives as shown in Equation 8. These partial derivatives are:

$$\frac{\partial S(b_i)}{\partial D} = -b_i S_0 (1-f) e^{-b_i D} \quad (S3)$$

$$\frac{\partial S(b_i)}{\partial f} = -S_0 [e^{-b_i D} - \delta(b_i)] \quad (S4)$$

$$\frac{\partial S(b_i)}{\partial S_0} = (1-f) e^{-b_i D} + f \delta(b_i) \quad (S5)$$

#### TE-related SNR penalty

The signal at  $b = 0$  ( $S_0$ ) measured at echo time TE is a weighted average based on the characteristics of the two compartments:

$$S_0 = S_{00} \left( (1 - f_0) e^{-\frac{TE}{T_2^d}} + f_0 e^{-\frac{TE}{T_2^p}} \right) \quad (S6)$$

where  $f_0$  is the size of the perfusion compartment when adjusting for transverse relaxation and  $S_{00}$  is the signal without diffusion weighting and  $TE = 0$ . As shown by Jerome et al.<sup>32</sup>, the  $f$  that is estimated without considering relaxation effects is:

$$f = f_0 e^{-\frac{TE}{T_2^p}} \left( (1 - f_0) e^{-\frac{TE}{T_2^d}} + f_0 e^{-\frac{TE}{T_2^p}} \right)^{-1} \quad (S7)$$

i.e. the fraction of signal from the perfusion compartment relative to the total signal. The inverse of Equation S7 is:

$$f_0 = f e^{-\frac{TE}{T_2^d}} \left( (1 - f) e^{-\frac{TE}{T_2^p}} + f e^{-\frac{TE}{T_2^d}} \right)^{-1} \quad (S8)$$

If Equation S8 is inserted into Equation S6, the result is:

$$S_0 = S_{00} e^{-TE \left( \frac{1}{T_2^d} + \frac{1}{T_2^p} \right)} \left( (1 - f) e^{-\frac{TE}{T_2^p}} + f e^{-\frac{TE}{T_2^d}} \right)^{-1} \quad (S9)$$

which shows the penalty factor used in the b-value optimization.

### Supporting Information Tables

Supporting Information Table S1. As table 1, but without an upper b-value limit. Optimal number of acquisitions of each optimal b-value for different total number of acquisitions ( $n_{\text{tot}}$ ) and the proportions for the limiting case of an infinite total number of acquisitions. The optimal b-values were  $b_0 = 0$ ,  $b_1 = 200 \text{ s/mm}^2$  and  $b_2$  as shown in the table

| $n_{\text{tot}}$              | 3   | 4   | 5   | 6   | 7   | 8   | 9   | 10  | 11  | 12  | $\infty$ |
|-------------------------------|-----|-----|-----|-----|-----|-----|-----|-----|-----|-----|----------|
| $n_0$                         | 1   | 1   | 1   | 1   | 1   | 2   | 2   | 2   | 2   | 2   | 19 %     |
| $n_1$                         | 1   | 2   | 2   | 3   | 3   | 3   | 4   | 4   | 5   | 5   | 43 %     |
| $n_2$                         | 1   | 1   | 2   | 2   | 3   | 3   | 3   | 4   | 4   | 5   | 38 %     |
| $b_2 \text{ [s/mm}^2\text{]}$ | 886 | 855 | 860 | 838 | 838 | 872 | 857 | 860 | 847 | 849 | 854      |

Supporting Information Table S2. As table 1, but without the correction for changes on the echo time (see detailed description in caption for Table 1 or Supporting Table S1). The optimal b-values were  $b_0 = 0$ ,  $b_1 = 200$  and  $b_2 = 800 \text{ s/mm}^2$

| $n_{\text{tot}}$ | 3 | 4 | 5 | 6 | 7 | 8 | 9 | 10 | 11 | 12 | $\infty$ |
|------------------|---|---|---|---|---|---|---|----|----|----|----------|
| $n_0$            | 1 | 1 | 1 | 1 | 1 | 2 | 2 | 2  | 2  | 2  | 19 %     |
| $n_1$            | 1 | 2 | 2 | 3 | 3 | 3 | 4 | 4  | 5  | 5  | 43 %     |
| $n_2$            | 1 | 1 | 2 | 2 | 3 | 3 | 3 | 4  | 4  | 5  | 38 %     |

Supporting Information Table S3. As table 1, but with neither an upper b-value limit nor a correction for changes on the echo time (see detailed description in caption for Table 1 or Supporting Table S1). The optimal b-values were  $b_0 = 0$ ,  $b_1 = 200 \text{ s/mm}^2$  and  $b_2$  as shown in the table

| $n_{\text{tot}}$              | 3    | 4    | 5    | 6    | 7    | 8    | 9    | 10   | 11   | 12   | $\infty$ |
|-------------------------------|------|------|------|------|------|------|------|------|------|------|----------|
| $n_0$                         | 1    | 1    | 1    | 1    | 1    | 2    | 2    | 2    | 2    | 2    | 20 %     |
| $n_1$                         | 1    | 1    | 2    | 2    | 3    | 3    | 3    | 4    | 4    | 5    | 39 %     |
| $n_2$                         | 1    | 2    | 2    | 3    | 3    | 3    | 4    | 4    | 5    | 5    | 40 %     |
| $b_2 \text{ [s/mm}^2\text{]}$ | 1299 | 1399 | 1294 | 1347 | 1290 | 1297 | 1334 | 1294 | 1322 | 1292 | 1297     |

## Supporting Information Figures

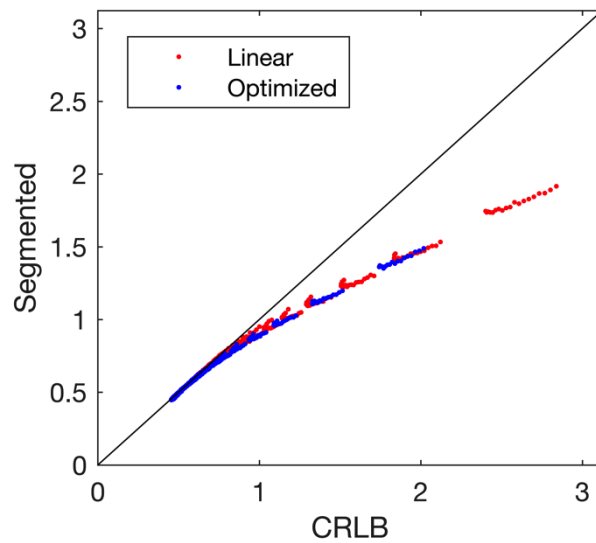

Supporting Information Figure S1. As Figure 1, but with  $D^* = 20 \mu\text{m}^2/\text{ms}$ . Comparison between estimation variability based on CRLB and segmented model fitting based on simulated data. The red and blue markers show results based on the linear and optimized b-value schemes respectively. Each data point represents the total relative error (Eq. 11 or its equivalent measure derived from segmented model fitting) for a given combination of  $D$  and  $f$ . The line of unity is shown in black.

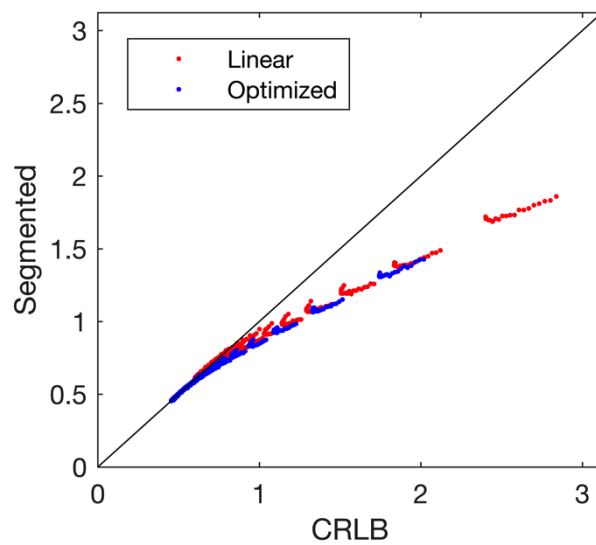

Supporting Information Figure S2. As Figure 1, but with  $D^* = 10 \mu\text{m}^2/\text{ms}$  (see detailed description in caption for Figure 1 or Supporting Figure S1)

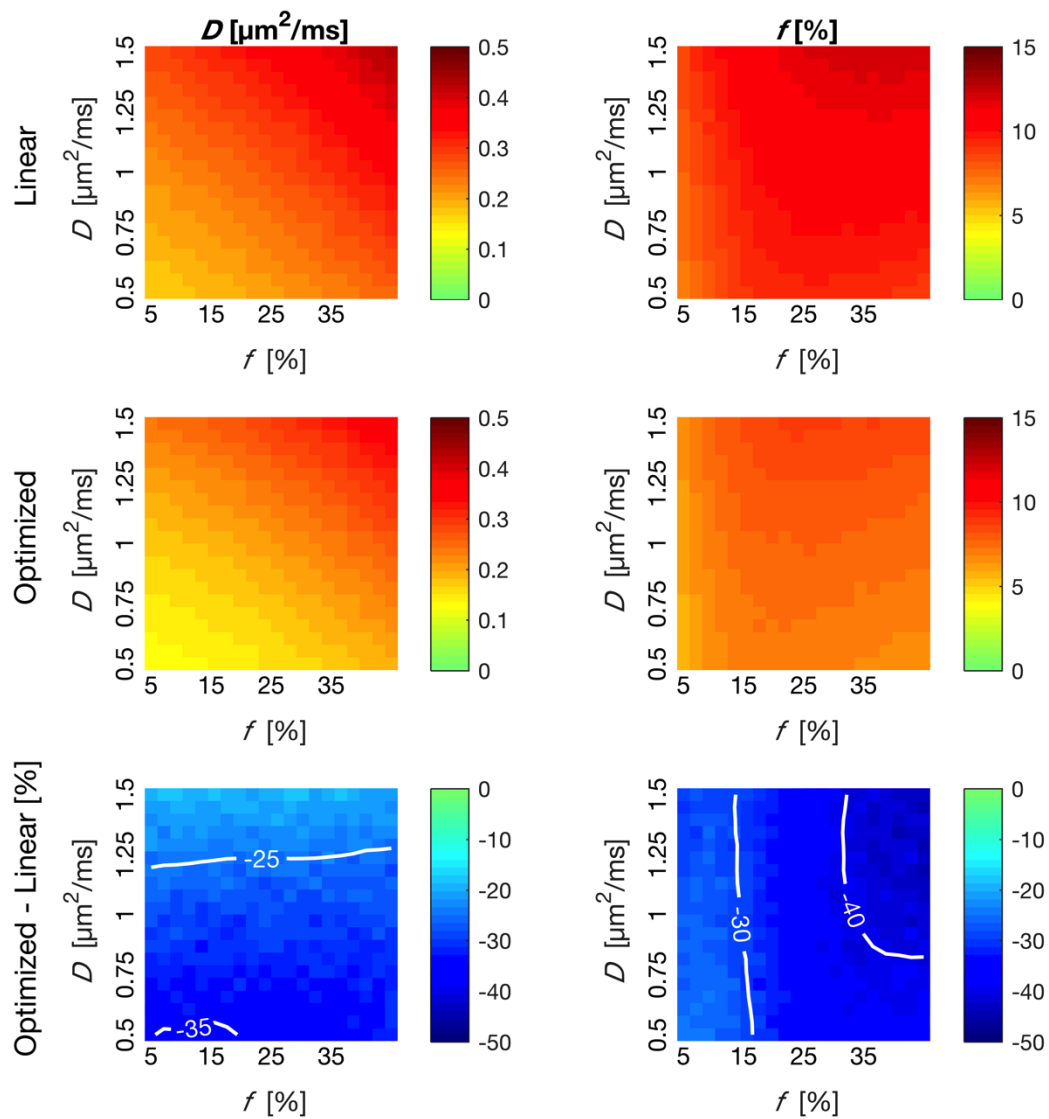

Supporting Information Figure S3. Each column shows the standard deviation of parameter estimates obtained from simulations at each combination of  $D$  and  $f$ , for each b-value scheme and their relative difference. The bottom plots are the same as those shown in Figure 2. Data were generated with  $D^* = 50 \mu\text{m}^2/\text{ms}$

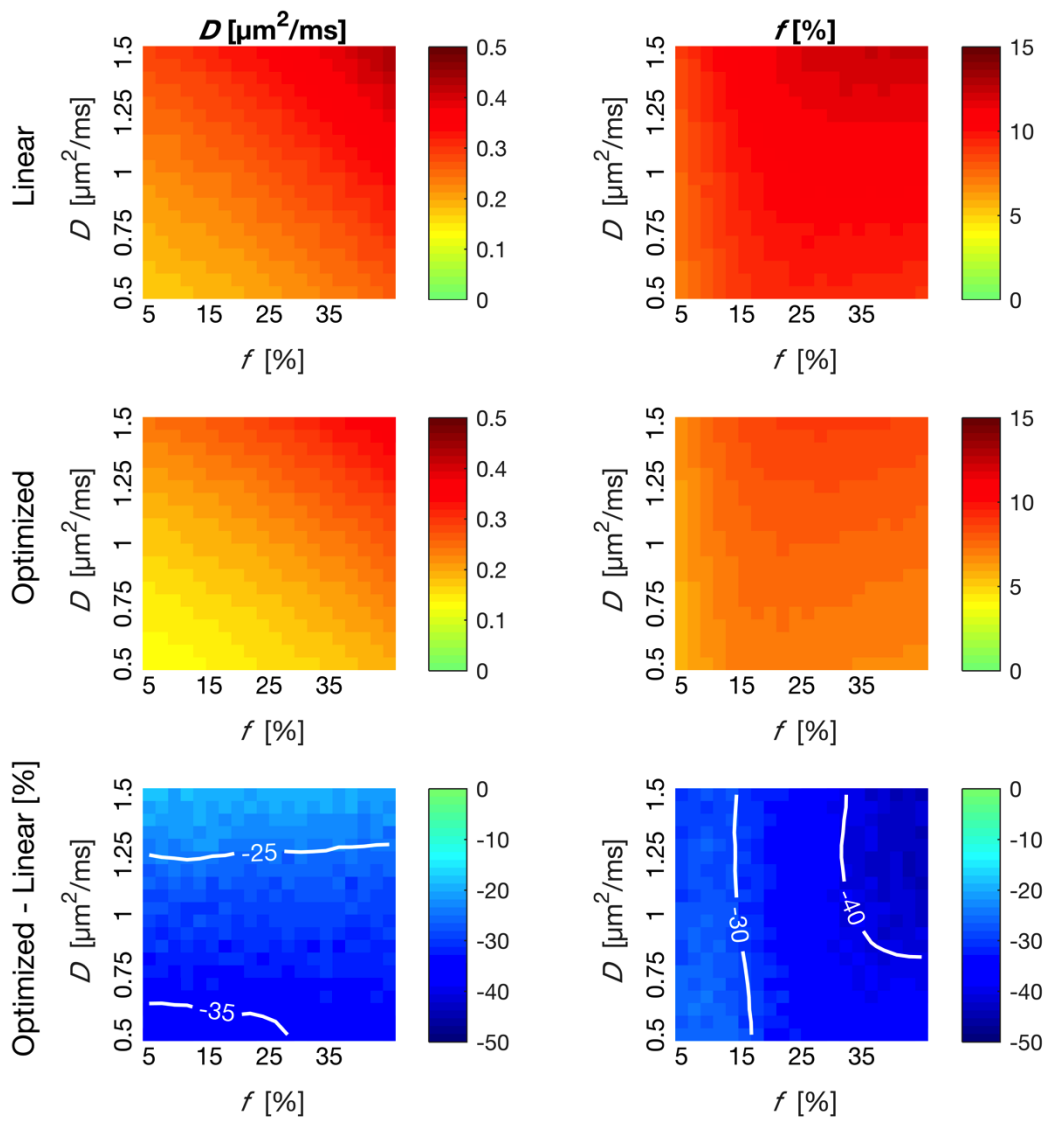

Supporting Information Figure S4. As Supporting Figure S3, but with  $D^* = 20 \mu\text{m}^2/\text{ms}$

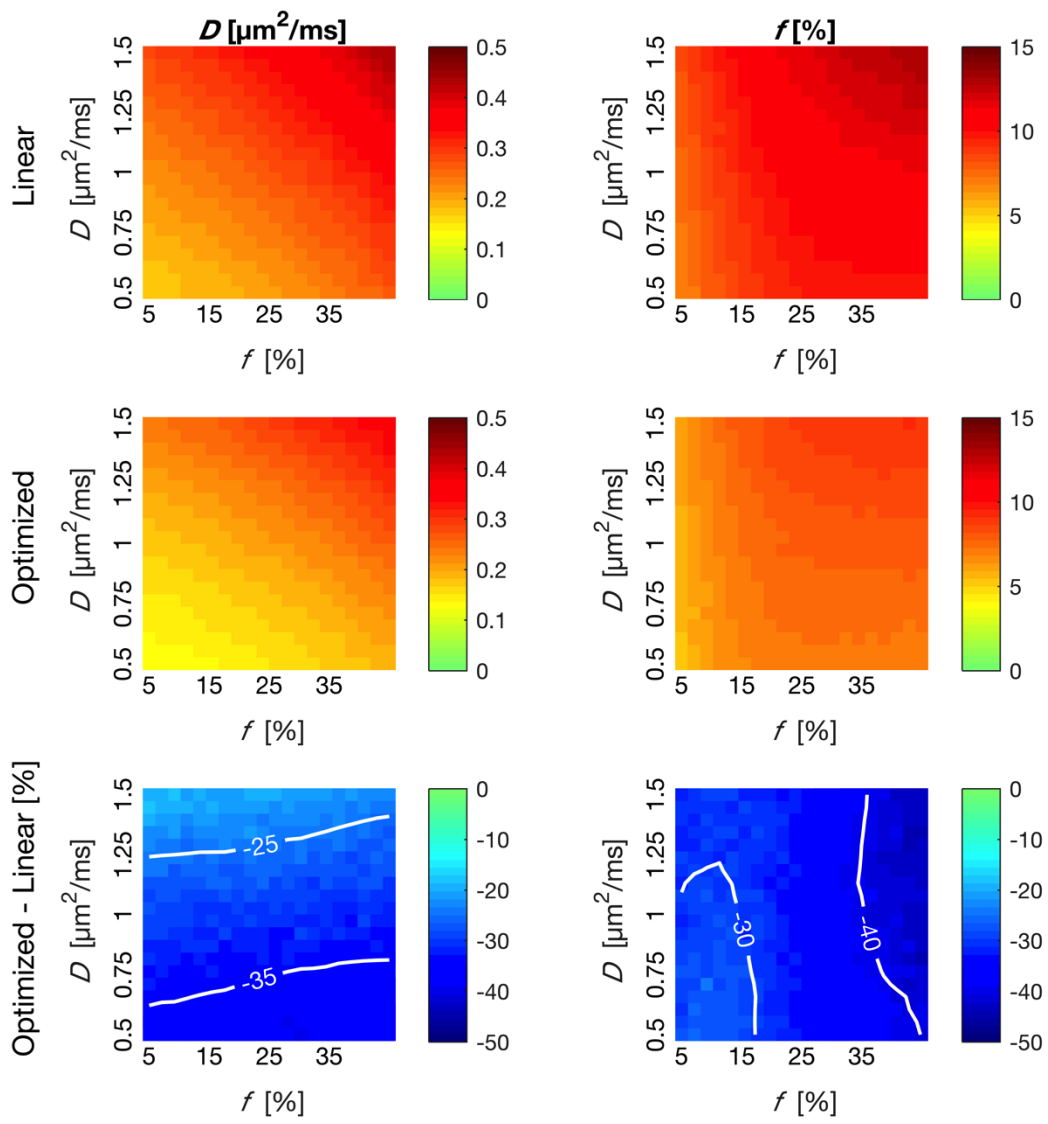

Supporting Information Figure S5. As Supporting Figure S3, but with  $D^* = 10 \mu\text{m}^2/\text{ms}$

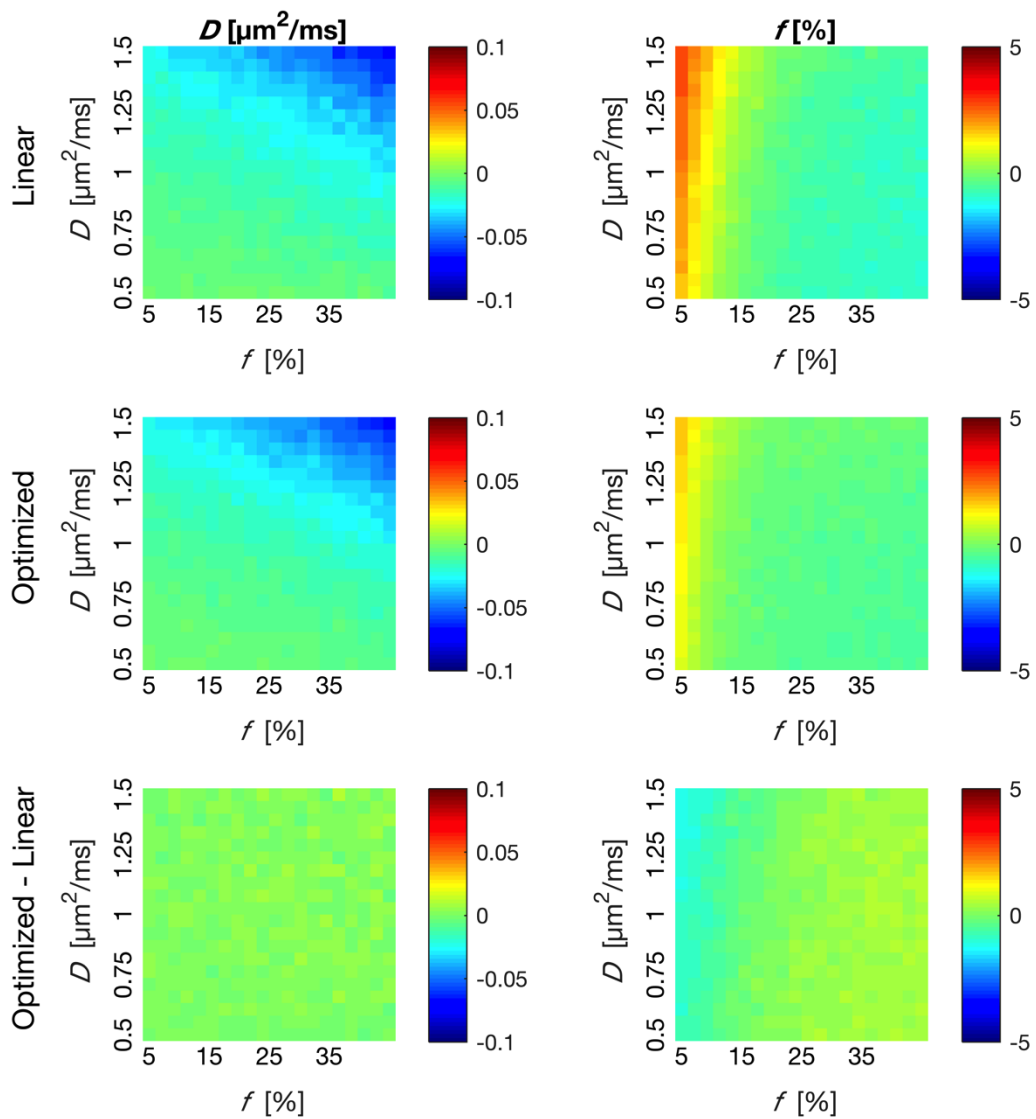

Supporting Information Figure S6. Each column shows the mean difference between parameter estimates obtained from simulations and their true value at each combination of  $D$  and  $f$ , for each b-value scheme and their difference. The data shown in the upper two rows of plots are the same as what is used in Figure 3, but the dependence on  $D$  is also shown in this figure. Data were generated with  $D^* = 50 \mu\text{m}^2/\text{ms}$



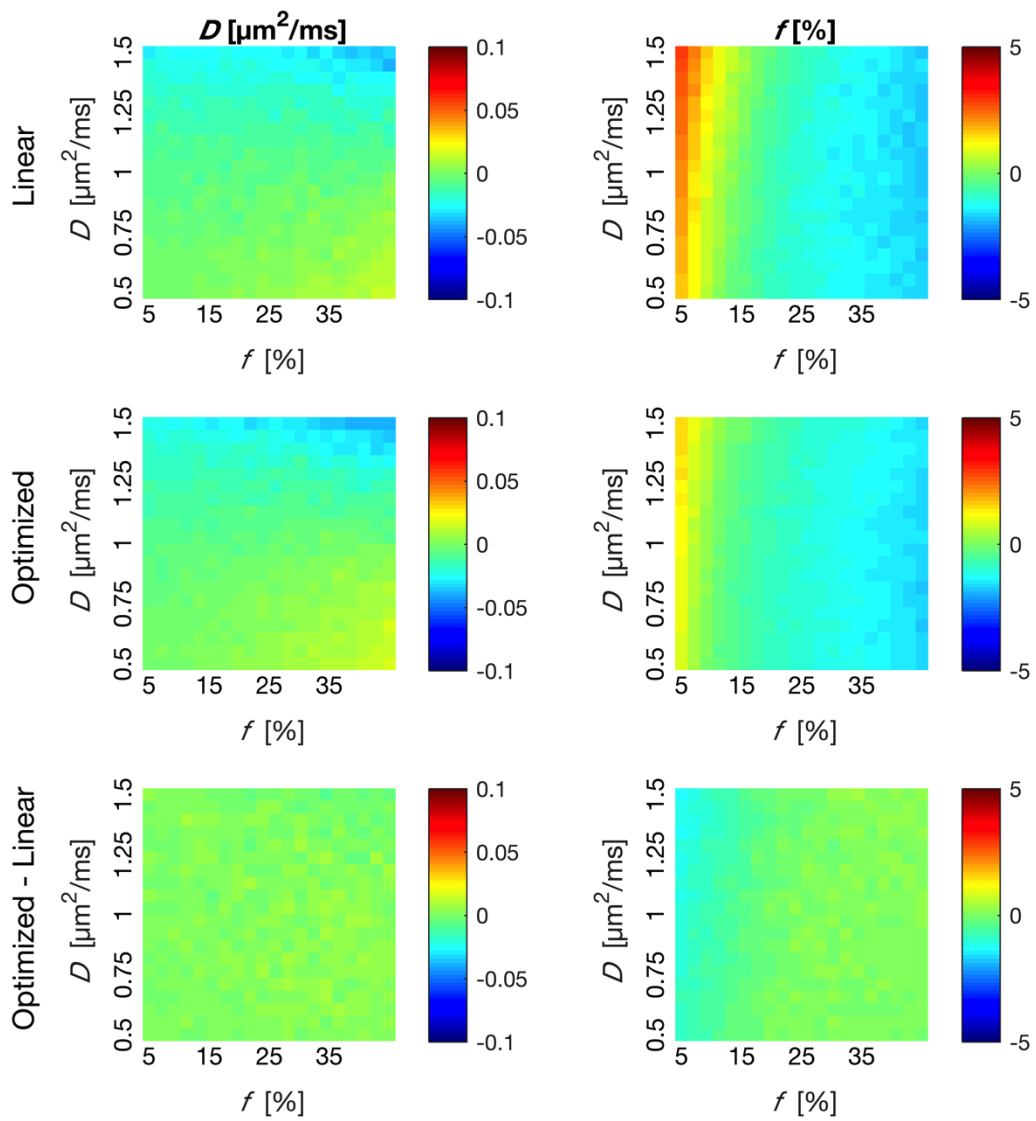

Supporting Information Figure S7. As Supporting Figure S6, but with  $D^* = 20 \mu\text{m}^2/\text{ms}$

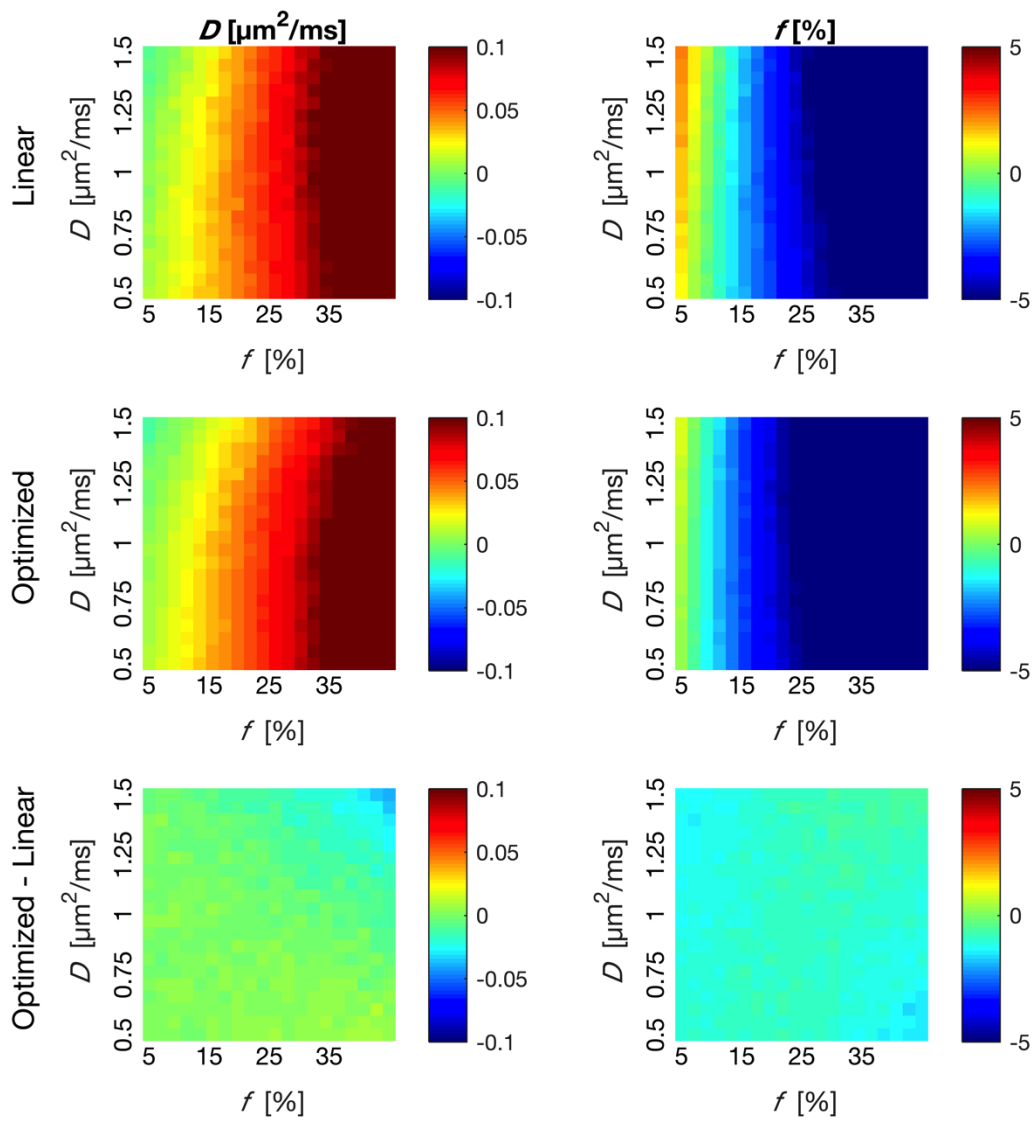

Supporting Information Figure S8. As Supporting Figure S6, but with  $D^* = 10 \mu\text{m}^2/\text{ms}$

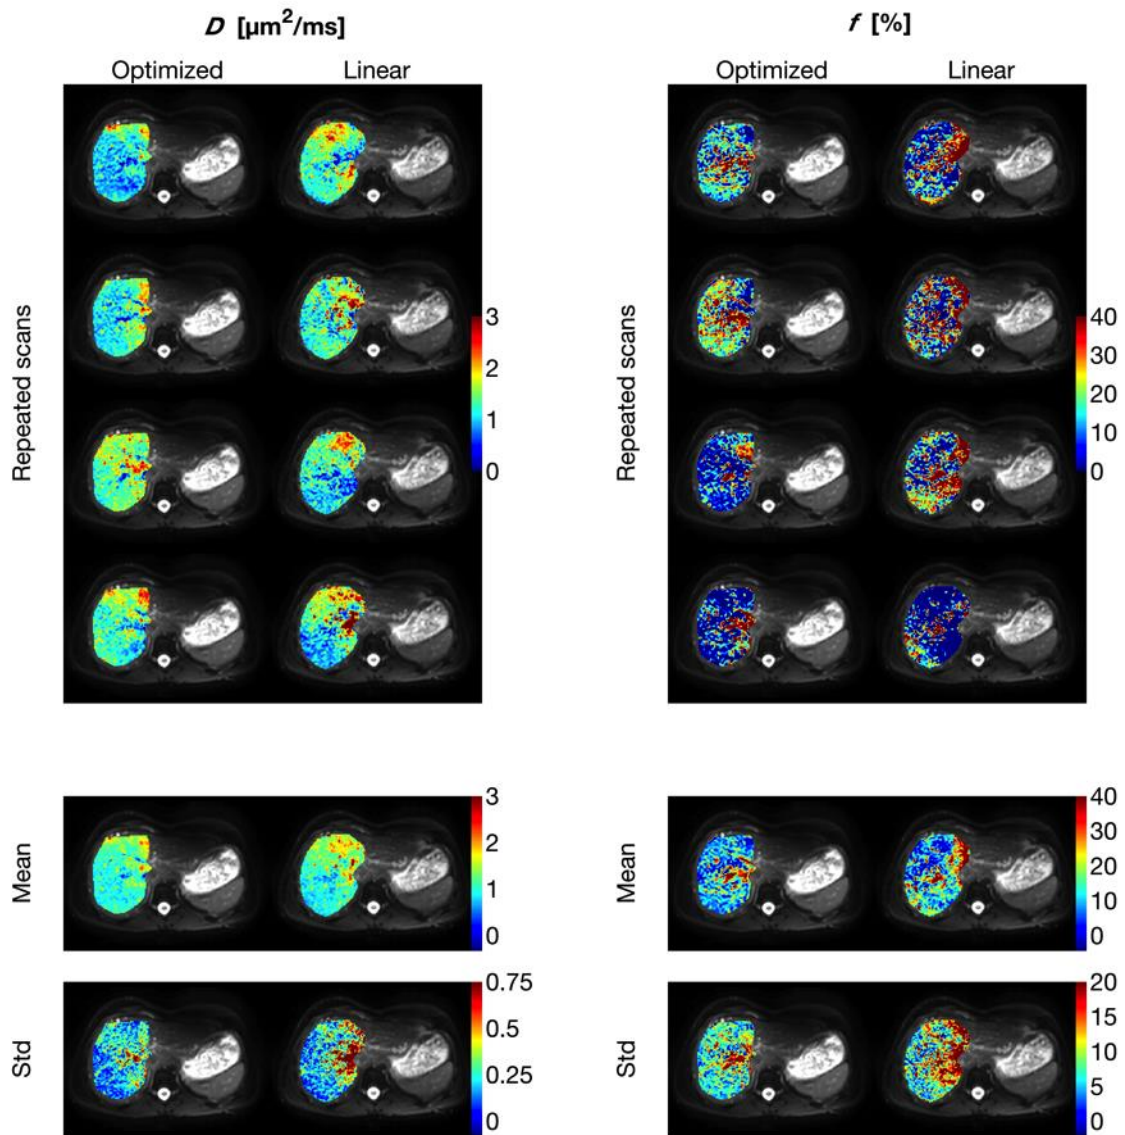

Supporting Information Figure S9. Parameter maps (color) of the right part of the liver superimposed on the  $b = 0$  image (gray scale) from an example subject. The figure shows parameter maps from repeated scans as well as the mean and the standard deviation of those maps. As Figures 5 and 6, but different subject

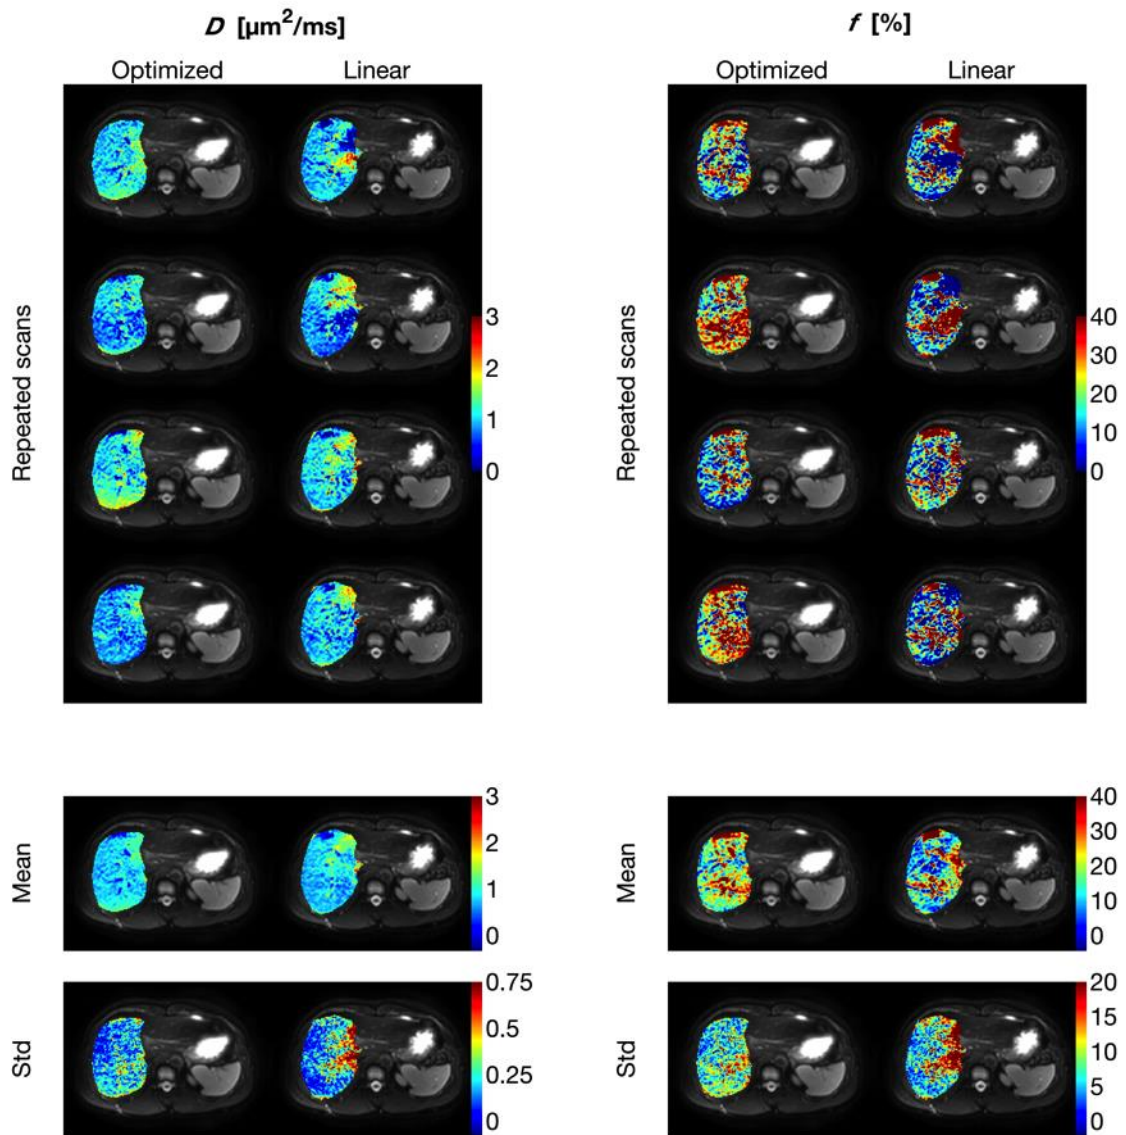

Supporting Information Figure S10. As Figures 5 and 6, but different subject (see caption for Figures 5 and 6, or Support Figure S9 for detailed description)

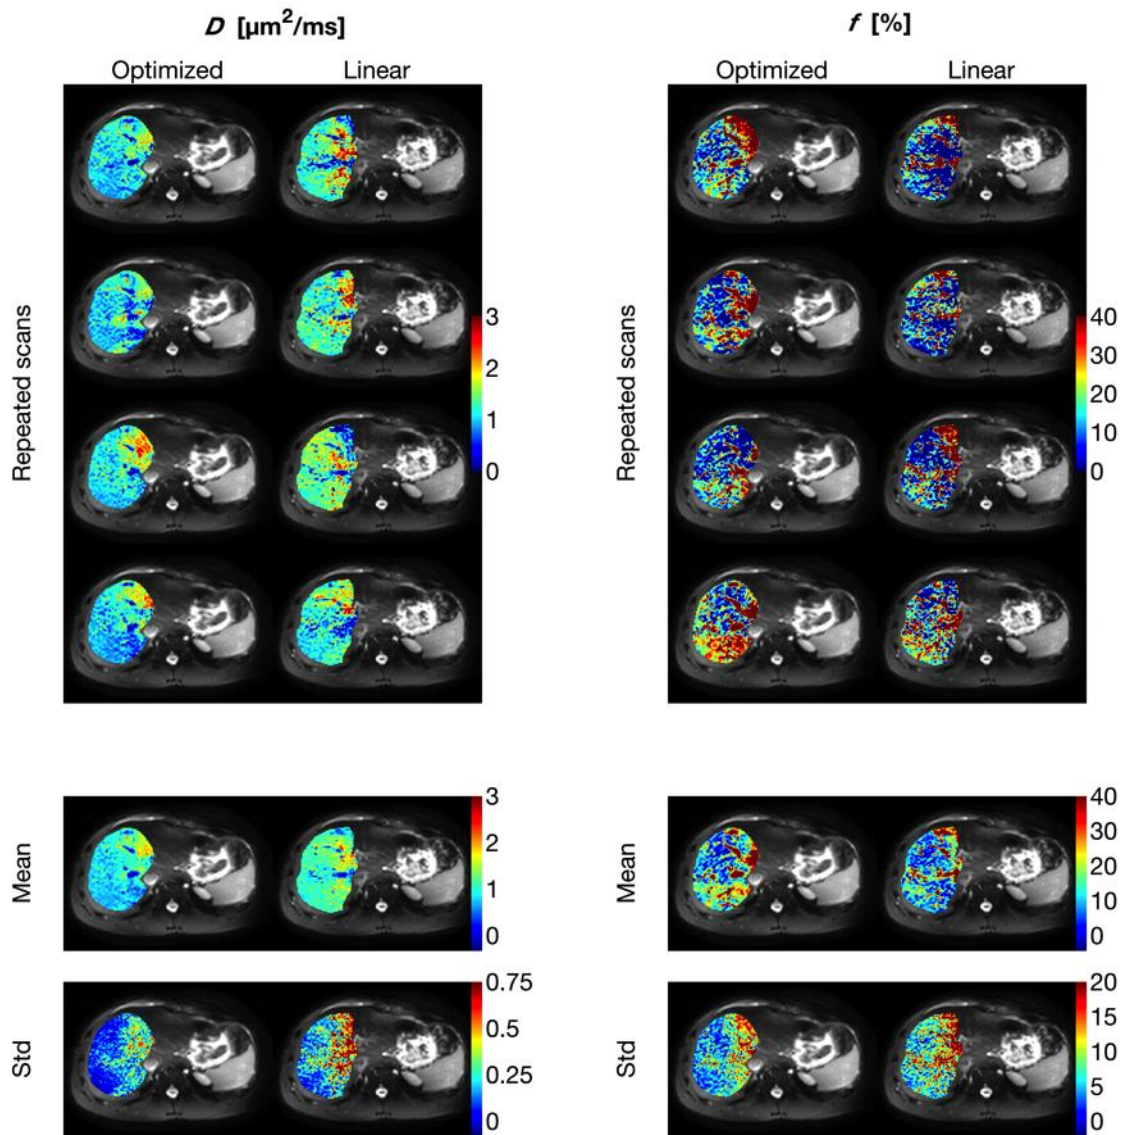

Supporting Information Figure S11. As Figures 5 and 6, but different subject (see caption for Figures 5 and 6, or Support Figure S9 for detailed description)



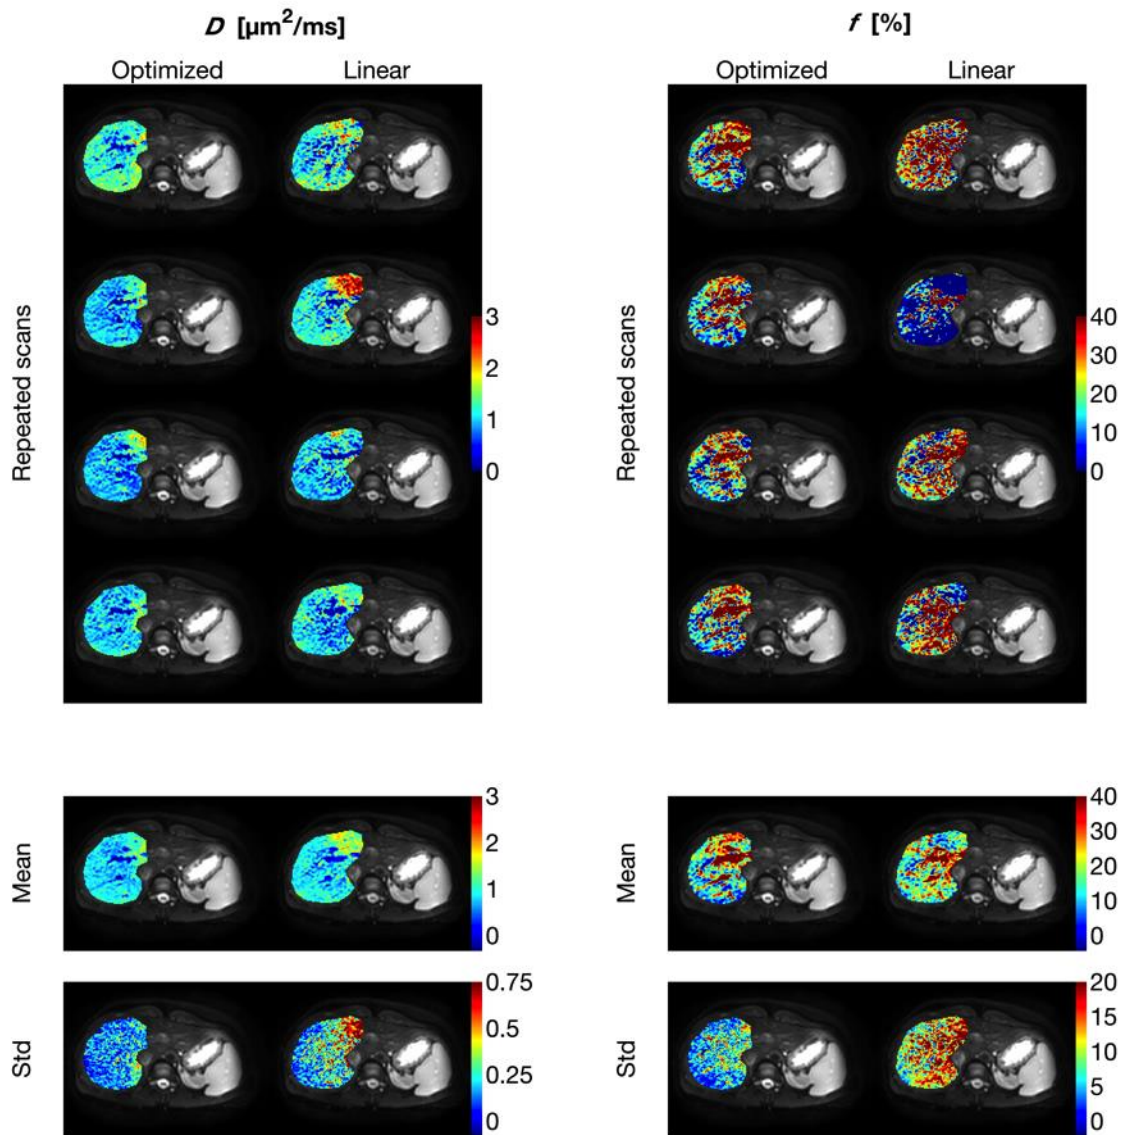

Supporting Information Figure S12. As Figures 5 and 6, but different subject (see caption for Figures 5 and 6, or Support Figure S9 for detailed description)

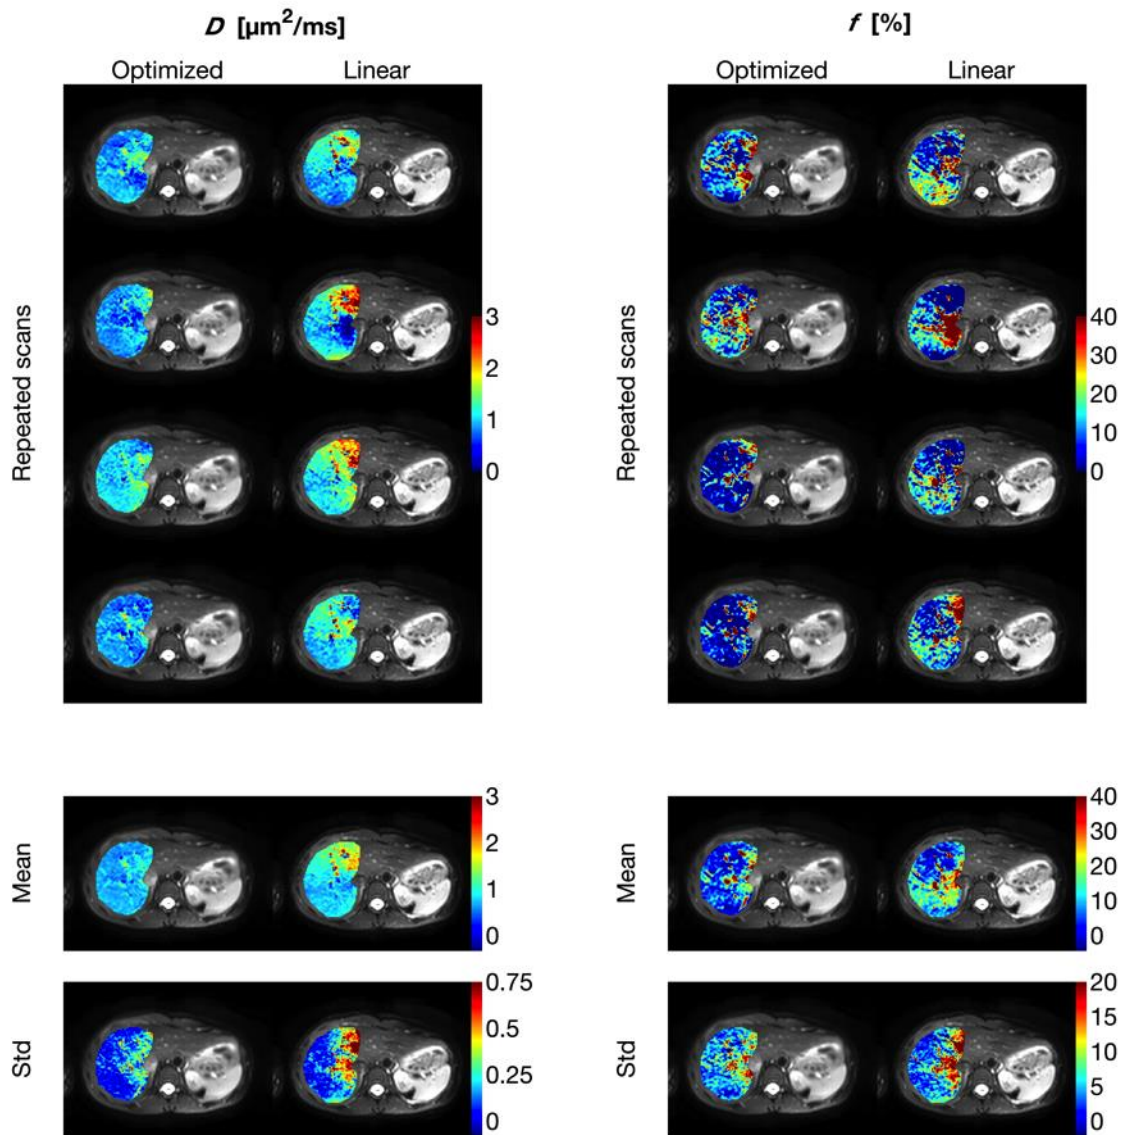

Supporting Information Figure S13. As Figures 5 and 6, but different subject (see caption for Figures 5 and 6, or Support Figure S9 for detailed description)

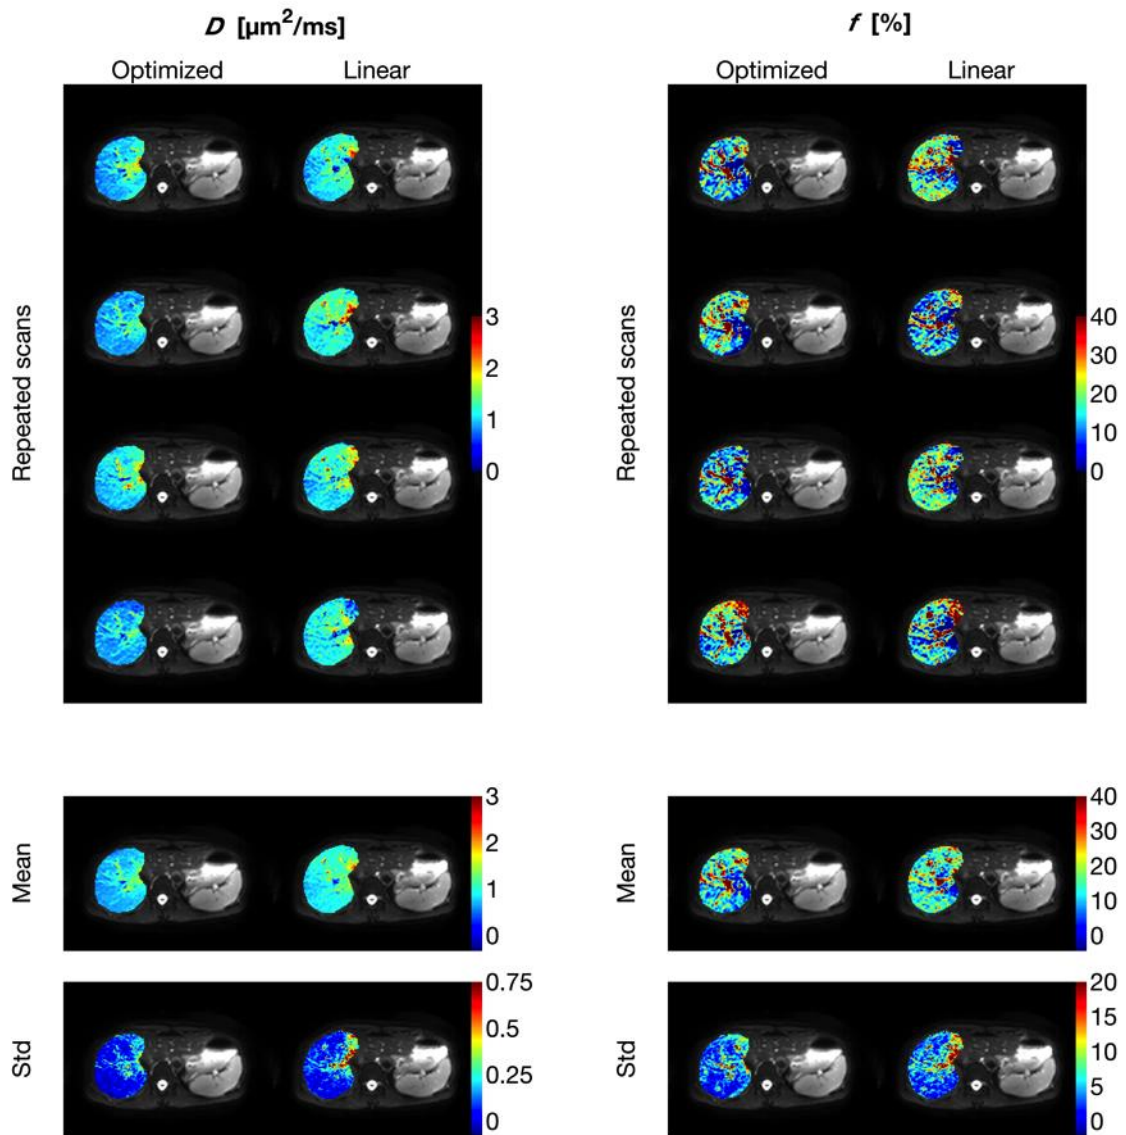

Supporting Information Figure S14. As Figures 5 and 6, but different subject (see caption for Figures 5 and 6, or Support Figure S9 for detailed description)



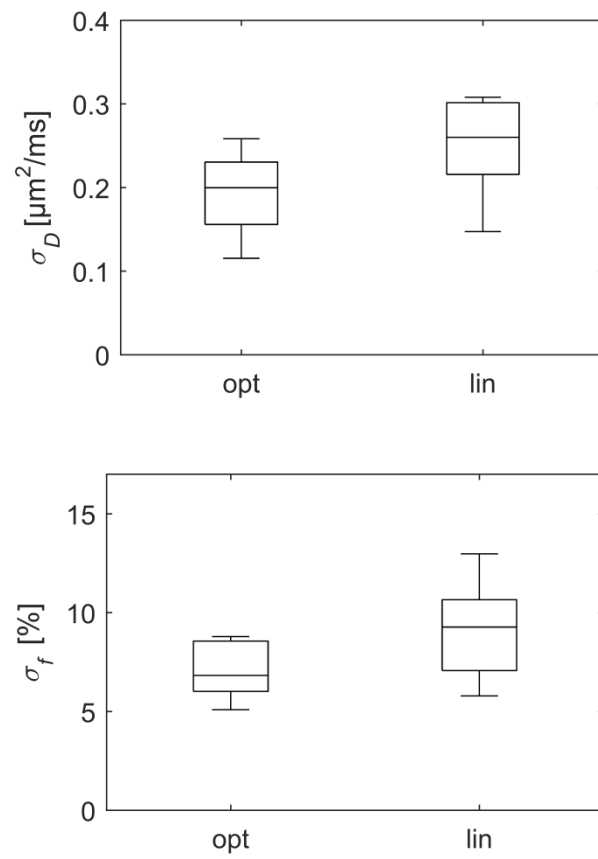

Supporting Information Figure S15. Median standard deviation of parameter estimates over repeated measurements for each subject and b-value scheme
